# Supplementary material for: Impact of unintentionally formed CH2O in oxygenated fuel exhausts on DeNOx-SCR at different NO2/NOx ratios under close to real conditions
Source: Royal Society of Chemistry journal article supplement (doi:10.1039/d2cy01935c), 2023-01-01
Supplement: d2cy01935c1.pdf [file d2cy01935c1.pdf]

ARTICLE

Supplemental Information

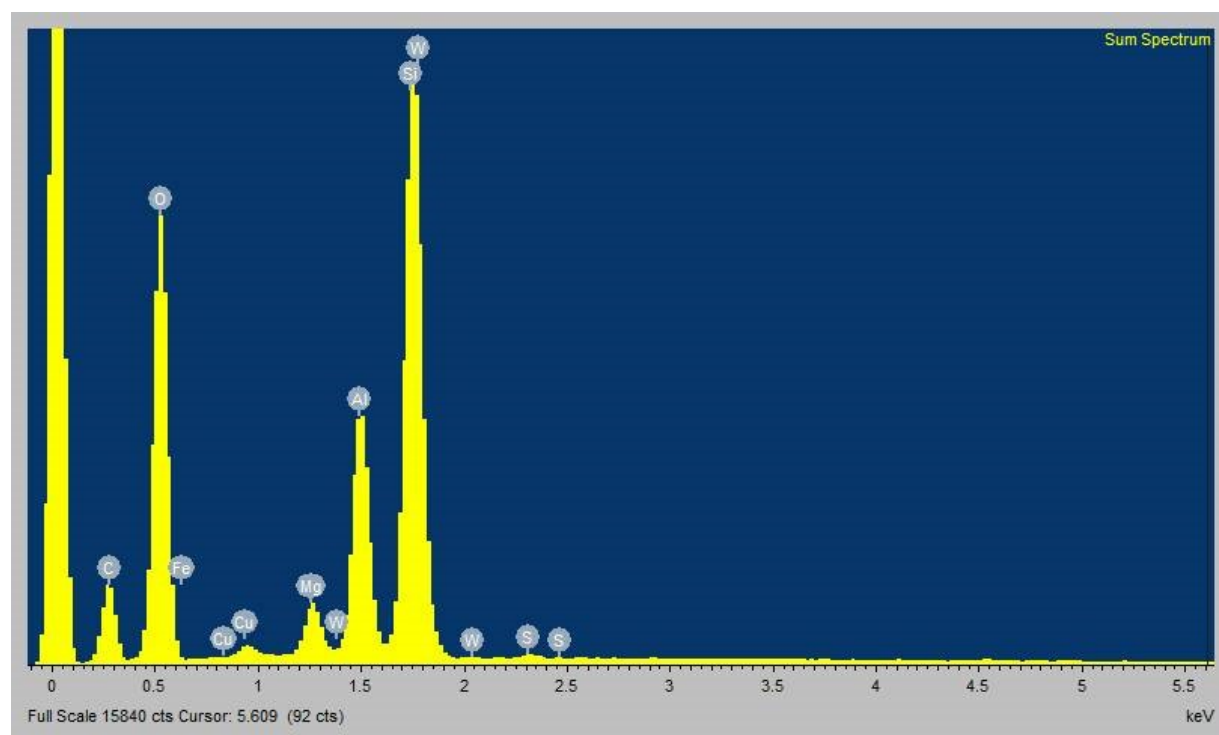

Fig. S1. EDX spectra for the SCR catalyst.

Table S1. Experimental conditions TPSR measurements.

|                          | Condi. | Step 1 | Step 2      | Step 3      | Step 4      | Step 5      | Step 6 | Step 7  |
|--------------------------|--------|--------|-------------|-------------|-------------|-------------|--------|---------|
| GHSV / h <sup>-1</sup>   | 40000  | 40000  | 40000       | 40000       | 40000       | 40000       | 40000  | 40000   |
| H <sub>2</sub> O / vol.% | 8      | 8      | 8           | 8           | 8           | 8           | 8      | 8       |
| CO <sub>2</sub> / vol.%  | 0      | 0      | 6           | 6           | 6           | 6           | 0      | 0       |
| O <sub>2</sub> / vol.%   | 10     | 0      | 10          | 10          | 10          | 10          | 0      | 0       |
| NH <sub>3</sub> / ppm    | 0      | 750    | 750         | 750         | 750         | 750         | 0      | 0       |
| NO <sub>x</sub> / ppm    | 500    | 0      | 500         | 500         | 500         | 500         | 0      | 0       |
| CH <sub>2</sub> O / ppm  | 0      | 0      | Var. 0, 100 | Var. 0, 100 | Var. 0, 100 | Var. 0, 100 | 0      | 0       |
| CO / ppm                 | 0      | 0      | Var. 0, 60  | Var. 0, 60  | Var. 0, 60  | Var. 0, 60  | 0      | 0       |
| DME / ppm                | 0      | 0      | Var. 0, 12  | Var. 0, 12  | Var. 0, 12  | Var. 0, 12  | 0      | 0       |
| N <sub>2</sub>           | Rest   | Rest   | Rest        | Rest        | Rest        | Rest        | Rest   | Rest    |
| Temp./ °C                | 550    | 200    | 200         | 200-550     | 550         | 550-200     | 200    | 200-550 |

|                        |   |   |   |   |   |    |   |   |
|------------------------|---|---|---|---|---|----|---|---|
| Temp. Gradient / K/min | 0 | 0 | 0 | 5 | 0 | -5 | 0 | 5 |
|------------------------|---|---|---|---|---|----|---|---|

**Table S2.** Experimental conditions NH<sub>3</sub>-TPD measurements.

|                          | Conditioning | Step 1                             | Step 2                          | Step 3                                              |
|--------------------------|--------------|------------------------------------|---------------------------------|-----------------------------------------------------|
| GHSV / h <sup>-1</sup>   | 40000        | 40000                              | 40000                           | 40000                                               |
| H <sub>2</sub> O / vol.% | 8            | 8                                  | 8                               | 8                                                   |
| CO <sub>2</sub> / vol.%  | 0            | 0                                  | 0                               | 0                                                   |
| O <sub>2</sub> / vol.%   | 10           | 10                                 | 0                               | 0                                                   |
| NH <sub>3</sub> / ppm    | 0            | 300                                | 0                               | 0                                                   |
| NO <sub>x</sub> / ppm    | 500          | 0                                  | 0                               | 0                                                   |
| CH <sub>2</sub> O / ppm  | 0            | Var. 0, 100                        | 0                               | 0                                                   |
| CO / ppm                 |              | Var. 0, 60                         | 0                               | 0                                                   |
| DME / ppm                |              | Var. 0, 12                         | 0                               | 0                                                   |
| N <sub>2</sub>           | Rest         | Rest                               | Rest                            | Rest                                                |
| Temperature / °C         | 550          | Var.<br>150, 200, 250, 300,<br>350 | Var.<br>150, 200, 250, 300, 350 | Var.<br>150-550, 200-550, 250-550, 300-550, 350-550 |
| Temp. Gradient / K/min   | 0            | 0                                  | 0                               | 5                                                   |

**Table S3.** Experimental conditions for the modified desorption investigation measurements.

|                          | Conditioning | Step 1           | Step 2           | Step 3                       | Step 4 | Step 5  |
|--------------------------|--------------|------------------|------------------|------------------------------|--------|---------|
| GHSV / h <sup>-1</sup>   | 40000        | 40000            | 40000            | 40000                        | 40000  | 40000   |
| H <sub>2</sub> O / vol.% | 8            | 8                | 8                | 8                            | 8      | 8       |
| CO <sub>2</sub> / vol.%  | 0            | 0                | 0                | 0                            | 0      | 0       |
| O <sub>2</sub> / vol.%   | 10           | 0                | 0                | 0                            | 0      | 0       |
| NH <sub>3</sub> / ppm    | 0            | 750              | 0                | 0                            | 0      | 0       |
| NO <sub>x</sub> / ppm    | 500          | 0                | 0                | 0                            | 0      | 0       |
| CH <sub>2</sub> O / ppm  | 0            | Var. 0, 100      | 0                | 0                            | 0      | 0       |
| CO / ppm                 |              | Var. 0, 60       | 0                | 0                            | 0      | 0       |
| DME / ppm                |              | Var. 0, 12       | 0                | 0                            | 0      | 0       |
| N <sub>2</sub>           | Rest         | Rest             | Rest             | Rest                         | Rest   | Rest    |
| Temperature / °C         | 550          | Var.<br>150, 200 | Var.<br>150, 200 | Var.<br>150-100, 200-<br>100 | 100    | 100-550 |
| Temp. Gradient / K/min   | 0            | 0                | 0                | -5                           | 0      | 5       |

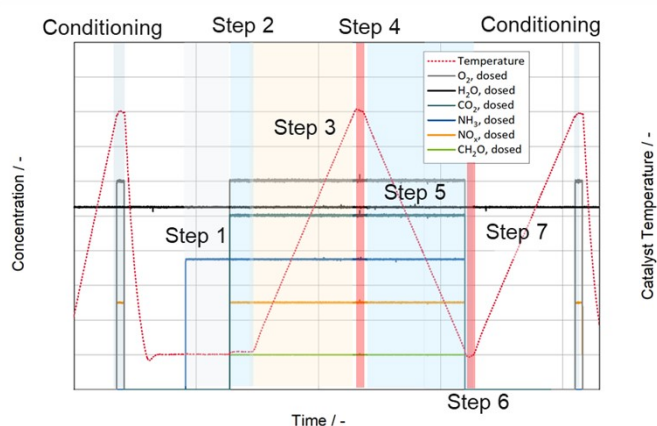

**Fig. S2.** Schematic representation of a performed TPSR experiment with  $\text{CH}_2\text{O}$  dosing at SGTB. The temperature ramps at the beginning and at the end show the performed conditioning of the catalyst before and after the experiment.

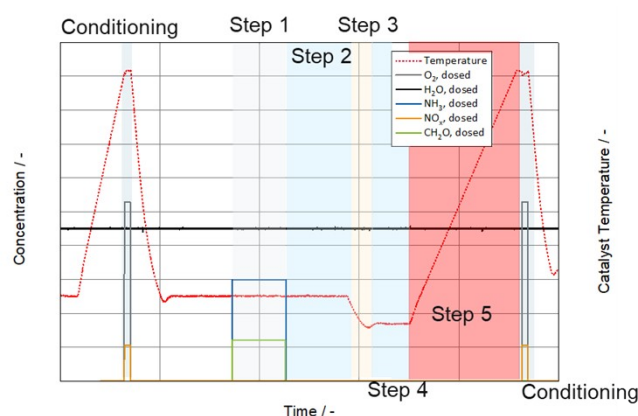

**Fig. S4.** Schematic representation of a performed modified  $\text{NH}_3$ -TPD experiment with  $\text{CH}_2\text{O}$  dosing at SGTB. The temperature ramps at the beginning and at the end show the performed conditioning of the catalyst before and after the experiment.

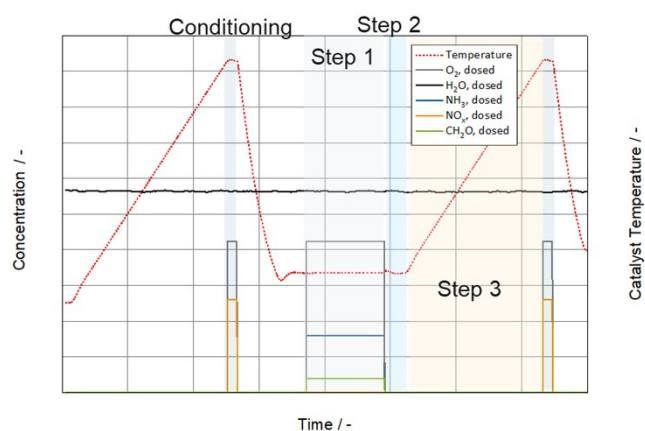

**Fig. S3.** Schematic representation of a performed  $\text{NH}_3$ -TPD experiment with  $\text{CH}_2\text{O}$  dosing at SGTB. The temperature ramps at the beginning and at the end show the performed conditioning of the catalyst before and after the experiment.

## Coverage of surface hydroxyl groups by formaldehyde

In order to perform in-situ Diffuse Reflectance Infrared Fourier Transform Spectroscopy (DRIFTS) measurements to study the formaldehyde adsorption on the catalyst surface, the commercial formaldehyde solution was added into water, and dosed into gas mixture. A small amount of methanol was present in commercial formaldehyde solution as the stabilizer, which cannot be avoided in the gas flow. By exposing the catalyst to an atmosphere with/without formaldehyde ( $\text{CH}_2\text{O}$ ) under SCR conditions at  $300\text{ }^\circ\text{C}$  (with only  $\text{NO}_2$  present), the results were depicted in Figure S5. The spectrum without  $\text{CH}_2\text{O}$  showed weak bands at  $3336$  and  $3277\text{ cm}^{-1}$ , which are attributed to the stretching modes of  $\text{NH}_3$ , which is adsorbed to Brønsted acid sites ( $\text{Al-OH-Si}$ ).<sup>1,2</sup> The negative band at  $3656\text{ cm}^{-1}$  is related to vibration modes of  $\text{Cu-OH}$  groups, which are coordinated by  $\text{NH}_3$ . Besides this, a very weak signal with negative intensity at  $3612\text{ cm}^{-1}$  is attributed to OH groups on Brønsted acid sites, as it is partially coordinated by  $\text{NH}_3$ .<sup>3</sup> When  $\text{CH}_2\text{O}$  was added, it adsorbs on the surface OH groups, leading the bands at  $3336$  and  $3277\text{ cm}^{-1}$  to lose intensity and this finding indicates that the presence of  $\text{CH}_2\text{O}$  promotes the  $\text{NO}_x$  conversion by  $\text{NH}_3$ , i.e. that  $\text{NH}_3$  adsorption is less likely under these reaction conditions. Unfortunately, the signal at  $3612\text{ cm}^{-1}$  is not distinct enough to judge, whether the corresponding site undergoes a similar effect.

In addition, one would expect a change of the signal at  $3656\text{ cm}^{-1}$  to positive intensity when  $\text{CH}_2\text{O}$  was added, as  $\text{NH}_3$  is consumed under these reaction condition, i.e. presence of  $\text{NO}_2$ , which would be consistent with our observation on the signal intensity at  $3336\text{ cm}^{-1}$  and  $3277\text{ cm}^{-1}$ . However, we found that the respective signal just gets less negative, which we attribute to that the presence of  $\text{CH}_2\text{O}$  partially cover the Cu-OH sites. Even, with Methanol present as a stabilizer, no indications in the spectra are found for the presence of methanol<sup>4</sup>, the signal at  $3647\text{ cm}^{-1}$  has to stem from another species. Hence, for the band appearing at  $3647\text{ cm}^{-1}$ , which has been observed by Xue *et al.*<sup>3</sup> as well, we tentatively assign it to water species on the zeolite surface.<sup>3</sup>

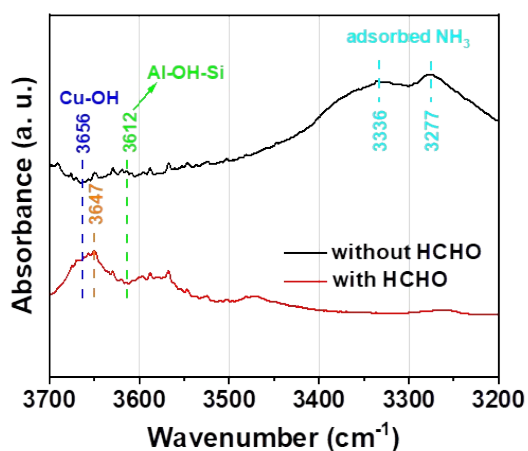

Fig. S5. The DRIFTS result of the catalyst under the  $\text{NO}_2$  SCR condition with/without the presence of  $\text{CH}_2\text{O}$  at  $300\text{ }^\circ\text{C}$

## Nitrate formation

The catalytic material was subjected to a pretreatment procedure involving exposure to  $\text{NO}$  and  $\text{NO}_2$  at a temperature of  $400\text{ }^\circ\text{C}$  with a 10% oxygen concentration. Subsequently, the catalyst was subjected to an exposure to 800 ppm of  $\text{NH}_3$  in a nitrogen environment at  $200\text{ }^\circ\text{C}$  for 30 minutes before being switched to an atmosphere containing formaldehyde under Selective Catalytic Reduction (SCR) conditions. The accompanying Figure S6 presents the results of DRIFTS analysis carried out at temperatures ranging from  $200\text{ }^\circ\text{C}$  to  $400\text{ }^\circ\text{C}$ . Upon exposure to an atmosphere containing only  $\text{NH}_3$ , two distinct bands were observed in the spectra, with the primary band at  $1444\text{ cm}^{-1}$  attributed to the presence of  $\text{NH}_4^+$  species resulting from  $\text{NH}_3$  adsorption onto Brønsted acid sites, and a weaker band at  $1618\text{ cm}^{-1}$  assigned to molecularly adsorbed  $\text{NH}_3$  on Lewis acid sites.<sup>5</sup> Upon introduction of the SCR atmosphere containing formaldehyde, additional spectral bands were identified, including one at  $1626\text{ cm}^{-1}$  commonly attributed to surface-bridging nitrates based on aluminum sites.<sup>5</sup>

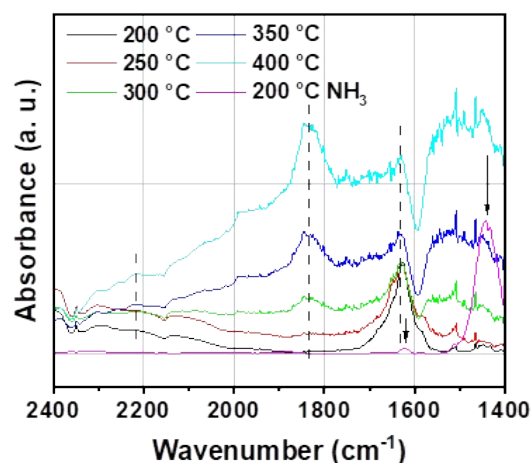

Fig. S6. The DRIFTS result of the catalyst under the  $\text{NH}_3$  SCR condition with the presence of  $\text{CH}_2\text{O}$  at  $200\text{ }^\circ\text{C}$  to  $400\text{ }^\circ\text{C}$

Table S4. DRIFTS Assignment.

| IR-Band               | Assignment                                    | References |
|-----------------------|-----------------------------------------------|------------|
| $1670\text{ cm}^{-1}$ | Nitrites, $\text{NO}_2^-$                     | 6          |
| $1626\text{ cm}^{-1}$ | Bridging nitrates on Al                       | 7–9        |
| $1617\text{ cm}^{-1}$ | $\text{NH}_3$ coordinated on Lewis acid site  | 10         |
| $1621\text{ cm}^{-1}$ |                                               |            |
| $1576\text{ cm}^{-1}$ | Monodentate nitrates on Cu                    | 8          |
| $1559\text{ cm}^{-1}$ | Monodentates nitrate                          | 11,12      |
| $1546\text{ cm}^{-1}$ | Monodentates nitrate                          | 13,14      |
| $1539\text{ cm}^{-1}$ |                                               |            |
| $1507\text{ cm}^{-1}$ | Nitrites, $\text{NO}_2^-$                     | 8          |
| $1489\text{ cm}^{-1}$ | $\text{NH}_4\text{NO}_3$                      | 7          |
| $1455\text{ cm}^{-1}$ | $\text{NH}_4^+$ on Brønsted acid              | 7          |
| $1457\text{ cm}^{-1}$ | Nitrite                                       | 13         |
| $1445\text{ cm}^{-1}$ | $\text{NH}_4^+$ from $\text{NH}_4\text{NO}_3$ | 7          |

## HCN formation

The accompanying figure displays the DRIFTS results for the investigation of the effect of CH<sub>2</sub>O and the NO<sub>2</sub>/NO<sub>x</sub> ratio on SCR conditions at 200 °C. The presence of CH<sub>2</sub>O and a NO<sub>2</sub>/NO<sub>x</sub> ratio of 0% is indicated by the C-H vibration bands at 2886 cm<sup>-1</sup> and 2955 cm<sup>-1</sup>, which are assigned to HMT according to previous studies.<sup>15,16</sup> This observation suggests the formation of HMT on the surface. Additionally, the IR band at 1313 cm<sup>-1</sup> suggests the presence of formamide, which can undergo dehydration to form HCN.

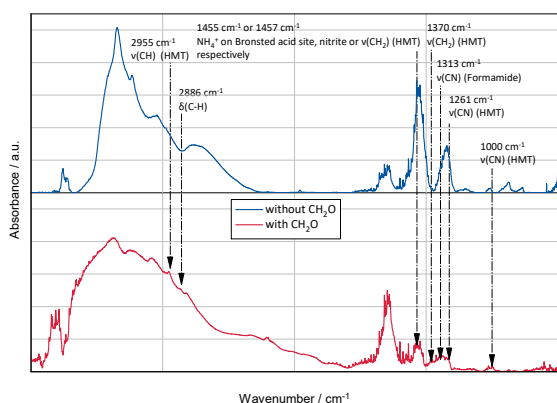

**Fig. S7.** DRIFTS spectra at 200 °C between 3800 and 600 cm<sup>-1</sup> after dosing NO, O<sub>2</sub>, H<sub>2</sub>O and, in the lower measurement, additional CH<sub>2</sub>O being dosed over the investigated SCR catalysts with preadsorbed NH<sub>3</sub> at 200 °C. Before preadsorbing NH<sub>3</sub>, the catalyst was pretreated with NO and NO<sub>2</sub> at 400 °C with 10% O<sub>2</sub>.

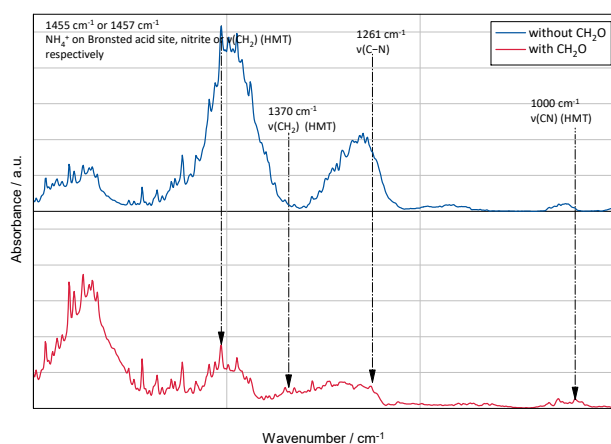

**Fig. S8.** DRIFTS spectra at 200 °C between 1700 and 950 cm<sup>-1</sup> after dosing NO, O<sub>2</sub>, H<sub>2</sub>O and, in the lower measurement, additional CH<sub>2</sub>O being dosed over the investigated SCR catalysts with preadsorbed NH<sub>3</sub> at 200 °C. Before preadsorbing NH<sub>3</sub>, the catalyst was pretreated with NO and NO<sub>2</sub> at 400 °C with 10% O<sub>2</sub>.

**Table S5.** DRIFTS Assignment.

| IR-Band               | Assignment                        | References |
|-----------------------|-----------------------------------|------------|
| 2955 cm <sup>-1</sup> | v(CH <sub>2</sub> ) stretch       | 15,16      |
| 2886 cm <sup>-1</sup> | δ(C-H)                            | 16,17      |
| 1688 cm <sup>-1</sup> | C=O                               | 18         |
| 1588 cm <sup>-1</sup> | OCO                               | 19         |
| 1457 cm <sup>-1</sup> | v(CH <sub>2</sub> ) scissor (HMT) | 15,16      |
| 1458 cm <sup>-1</sup> |                                   |            |
| 1370 cm <sup>-1</sup> | v(CH <sub>2</sub> ) wag (HMT)     | 15,16      |
| 1372 cm <sup>-1</sup> |                                   |            |
| 1313 cm <sup>-1</sup> | CN                                | 18         |
| 1261 cm <sup>-1</sup> | v(C-N)                            | 17         |
| 1000 cm <sup>-1</sup> | v(CN) stretch (HMT)               | 15         |

## H<sub>2</sub>O and formaldehyde influence under NO<sub>2</sub> SCR conditions

The TPSR experiments with and without CH<sub>2</sub>O, described in the original draft, were repeated accordingly, but now with the absence of H<sub>2</sub>O vapor, fed into the gas stream. Figure S9 displays the NO<sub>x</sub> conversion efficiency of the NH<sub>3</sub> SCR with a NO<sub>2</sub>/NO<sub>x</sub> ratio of 100% under the presence and absence of H<sub>2</sub>O and CH<sub>2</sub>O. The characteristic increase of NO<sub>x</sub> conversion efficiency at low temperatures with CH<sub>2</sub>O can be observed with and without H<sub>2</sub>O added during the experiment. This shows that even without H<sub>2</sub>O, no NH<sub>4</sub>NO<sub>3</sub> was formed from the reaction of NH<sub>3</sub> and NO<sub>2</sub> and no deactivation of the catalyst occurs. At high temperatures of T > 370 °C a significant promoting effect of H<sub>2</sub>O can be observed, while at temperatures of T < 320 °C a lesser deactivation effect of NH<sub>4</sub>NO<sub>3</sub> occurred. Additionally, the overall selectivity to N<sub>2</sub>O increased in the absence of H<sub>2</sub>O, for both experiments with and without CH<sub>2</sub>O. Displayed in Figure S10, with the absence of H<sub>2</sub>O an increased N<sub>2</sub>O peak from 108 ppm to 160 ppm can be seen for the experiment without CH<sub>2</sub>O. In the presence of CH<sub>2</sub>O no peak is detected, but the N<sub>2</sub>O concentration is elevated with H<sub>2</sub>O. These results go in line with the results, described by Han et al.<sup>20</sup>, where H<sub>2</sub>O hinders the NH<sub>4</sub>NO<sub>3</sub> formation and increases the selectivity for decomposition to NO<sub>2</sub> instead of N<sub>2</sub>O.

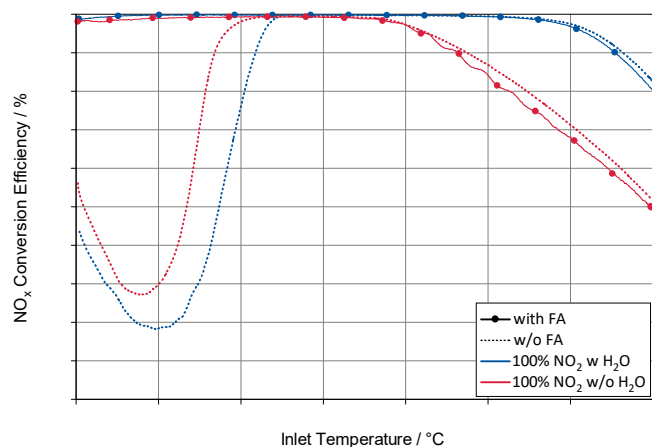

**Fig. 9.** NO<sub>x</sub> conversion efficiency in % versus inlet temperature in °C for the investigated Cu-CHA SCR catalyst in the presence (100 ppm CH<sub>2</sub>O) and the absence of formaldehyde and in the presence (8% H<sub>2</sub>O) and the absence of H<sub>2</sub>O vapor. The dotted line refers to the curves without formaldehyde; red: without H<sub>2</sub>O vapor; blue: with H<sub>2</sub>O vapor

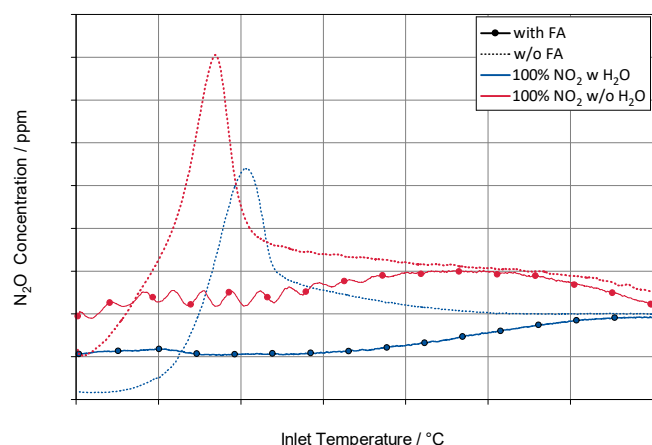

**Fig. 10.** N<sub>2</sub>O concentration versus inlet temperature in °C for the investigated Cu-CHA SCR catalyst in the presence (100 ppm CH<sub>2</sub>O) and the absence of formaldehyde and in the presence (8% H<sub>2</sub>O) and the absence of H<sub>2</sub>O vapor. The dotted line refers to the curves without formaldehyde; red: without H<sub>2</sub>O vapor; blue: with H<sub>2</sub>O vapor

## References

- Z. Chen, C. Bian, Y. Guo, L. Pang and T. Li, Efficient Strategy to Regenerate Phosphorus-Poisoned Cu-SSZ-13 Catalysts for the NH<sub>3</sub>-SCR of NO<sub>x</sub>: The Deactivation and Promotion Mechanism of Phosphorus, *ACS Catal.*, 2021, **11**, 12963–12976.
- W. Hu, U. Iacobone, F. Gramigni, Y. Zhang, X. Wang, S. Liu, C. Zheng, I. Nova, X. Gao and E. Tronconi, Unraveling the Hydrolysis of Z<sub>2</sub>Cu<sup>2+</sup> to ZCu<sup>2+</sup>(OH)<sup>-</sup> and Its Consequences for the Low-Temperature Selective Catalytic Reduction of NO on Cu-CHA Catalysts, *ACS Catal.*, 2021, **11**, 11616–11625.
- H. Xue, X. Guo, T. Meng, Q. Guo, D. Mao and S. Wang, Cu-ZSM-5 Catalyst Impregnated with Mn-Co Oxide for the Selected Catalytic Reduction of NO: Physicochemical Property–Catalytic Activity Relationship and In Situ DRIFTS Study for the Reaction Mechanism, *ACS Catal.*, 2021, **11**, 7702–7718.
- G. Mirth, J. A. Lercher, M. W. Anderson and J. Klinowski, Adsorption complexes of methanol on zeolite ZSM-5, *Faraday Trans.*, 1990, **86**, 3039.
- Di Wang, L. Zhang, K. Kamasamudram and W. S. Epling, In Situ-DRIFTS Study of Selective Catalytic Reduction of NO<sub>x</sub> by NH<sub>3</sub> over Cu-Exchanged SAPO-34, *ACS Catal.*, 2013, **3**, 871–881.
- T. Zhang, F. Qiu, H. Chang, X. Li and J. Li, Identification of active sites and reaction mechanism on low-temperature SCR activity over Cu-SSZ-13 catalysts prepared by different methods, *Catal. Sci. Technol.*, 2016, **6**, 6294–6304.
- D. Yao, B. Liu, F. Wu, Y. Li, X. Hu, W. Jin and X. Wang, N<sub>2</sub>O Formation Mechanism During Low-Temperature NH<sub>3</sub>-SCR over Cu-SSZ-13 Catalysts with Different Cu Loadings, *Ind. Eng. Chem. Res.*, 2021, **60**, 10083–10093.
- Q. Liu, Z. Fu, L. Ma, H. Niu, C. Liu, J. Li and Z. Zhang, MnO-CeO<sub>2</sub> supported on Cu-SSZ-13: A novel SCR catalyst in a wide temperature range, *Applied Catalysis A: General*, 2017, **547**, 146–154.
- L. Negahdar, N. E. Omori, M. G. Quesne, M. D. Frogley, F. Cacho-Nerin, W. Jones, S. W. T. Price, C. R. A. Catlow and A. M. Beale, Elucidating the Significance of Copper and Nitrate Speciation in Cu-SSZ-13 for N<sub>2</sub>O Formation during NH<sub>3</sub>-SCR, *ACS Catal.*, 2021, **11**, 13091–13101.
- L. Xie, F. Liu, K. Liu, X. Shi and H. He, Inhibitory effect of NO<sub>2</sub> on the selective catalytic reduction of NO<sub>x</sub> with NH<sub>3</sub> over one-pot-synthesized Cu-SSZ-13 catalyst, *Catal. Sci. Technol.*, 2014, **4**, 1104.
- S. Yang, Y. Fu, Y. Liao, S. Xiong, Z. Qu, N. Yan and J. Li, Competition of selective catalytic reduction and non selective catalytic reduction over MnO<sub>x</sub>/TiO<sub>2</sub> for NO removal: the relationship between gaseous NO concentration and N<sub>2</sub>O selectivity, *Catal. Sci. Technol.*, 2014, **4**, 224–232.
- Y. Ji, T. J. Toops, U. M. Graham, G. Jacobs and M. Crocker, A kinetic and DRIFTS study of supported Pt catalysts for NO oxidation, *Catal Lett*, 2006, **110**, 29–37.
- C. Yu, L. Wang and B. Huang, In Situ DRIFTS Study of the Low Temperature Selective Catalytic Reduction of NO with NH<sub>3</sub> over MnO<sub>x</sub> Supported on Multi-Walled Carbon Nanotubes Catalysts, *Aerosol Air Qual. Res.*, 2015, **15**, 1017–1027.
- D. Yang, J. Li, M. Wen and C. Song, Enhanced activity of Cd-doped Cu/ZrO<sub>2</sub> for nitrogen oxides reduction with propylene in the presence of excess oxygen, *Catalysis Today*, 2008, **139**, 2–7.
- D. M. Yufanyi, J. F. Tendo, A. M. Ondoh and J. K. Mbadcam, CdO Nanoparticles by Thermal Decomposition of a Cadmium-Hexamethylenetetramine Complex, *JMSR*, 2014, **3**. DOI: 10.5539/jmsr.v3n3p1.
- J. E. Bertie and M. Solinas, Infrared and Raman spectra and the vibrational assignment of hexamethylenetetramine- h<sub>12</sub> and - d<sub>12</sub>, *The Journal of Chemical Physics*, 1974, **61**, 1666–1677.
- A. B. Ngo, T. H. Vuong, H. Atia, U. Bentrup, V. A. Kondratenko, E. V. Kondratenko, J. Rabeah, U. Ambruster and A. Brückner, Effect of Formaldehyde in Selective Catalytic Reduction of NO<sub>x</sub> by Ammonia (NH<sub>3</sub>-SCR) on a Commercial V<sub>2</sub>O<sub>5</sub>-WO<sub>3</sub>/TiO<sub>2</sub> Catalyst under Model Conditions, *Environmental science & technology*, 2020, **54**, 11753–11761.

- 18 M. M. Dawley, A. M. Scott, F. C. Hill, J. Leszczynski and T. M. Orlando, Adsorption of Formamide on Kaolinite Surfaces: A Combined Infrared Experimental and Theoretical Study, *J. Phys. Chem. C*, 2012, **116**, 23981–23991.
  - 19 Y. DENKWITZ, A. KARPENKO, V. PLZAK, R. LEPELT, B. SCHUMACHER and R. BEHM, Influence of CO<sub>2</sub> and H<sub>2</sub> on the low-temperature water–gas shift reaction on Au/CeO<sub>2</sub> catalysts in idealized and realistic reformat, *Journal of Catalysis*, 2007, **246**, 74–90.
  - 20 J. Han, A. Wang, G. Isapour, H. Härelind, M. Skoglundh, D. Creaser and L. Olsson, N<sub>2</sub>O Formation during NH<sub>3</sub>-SCR over Different Zeolite Frameworks: Effect of Framework Structure, Copper Species, and Water, *Ind. Eng. Chem. Res.*, 2021, **60**, 17826–17839.
-
